# Supplementary material for: Glucose Can Protect Membranes against Dehydration Damage by Inducing a Glassy Membrane State at Low Hydrations
Source: PubMed Central journal article supplement (PMC6359629; doi:10.3390/membranes9010015), 2019-01-15
Supplement: membranes-09-00015-s001.pdf [file membranes-09-00015-s001.pdf]

# Supplementary Materials: Glucose Can Protect Membranes against Dehydration Damage by Inducing a Glassy Membrane State at Low Hydrations

Alexander Dhaliwal, Adree Khondker, Richard Alsop and Maikel C. Rheinstädter \*

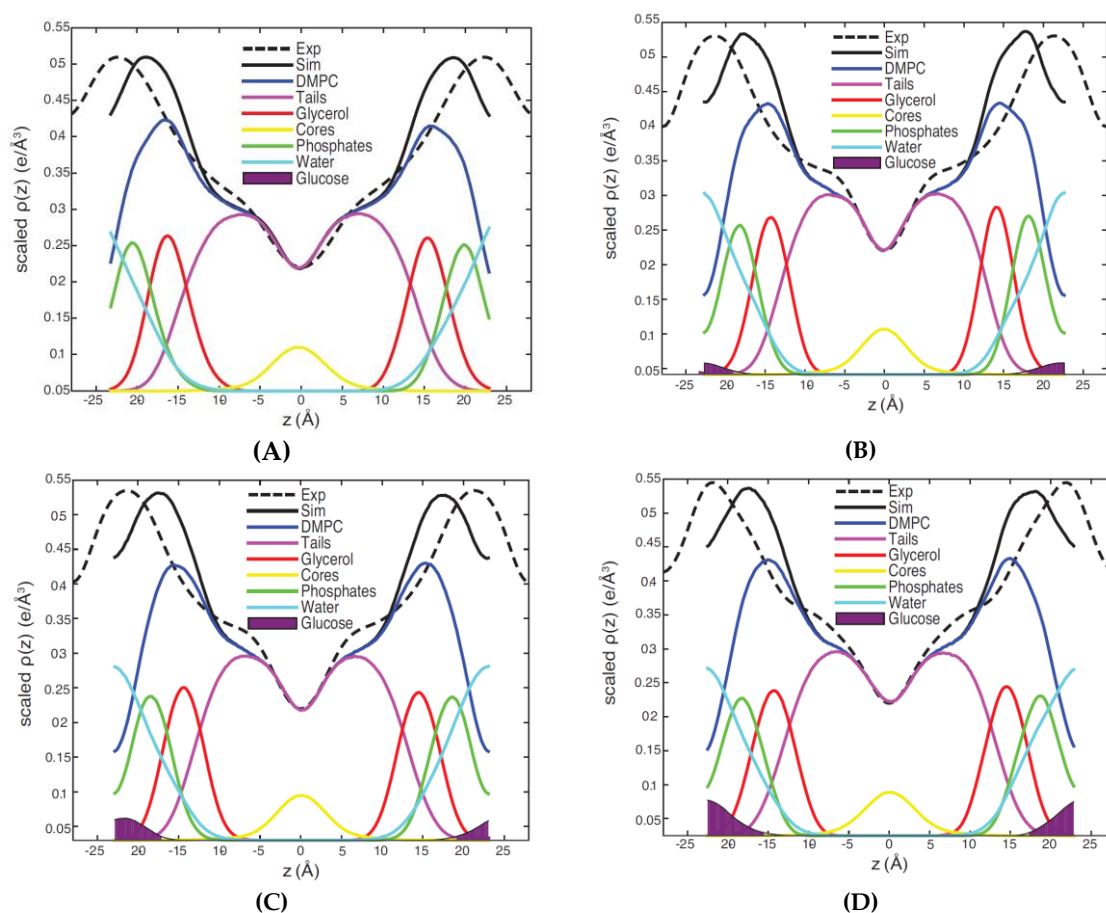

**Figure S1.** Electron Density Profiles for X-ray diffraction data (dashed black) and MD simulations (solid black) at (A) 0 mol%, (B) 2.5 mol%, (C) 5 mol%, and (D) 10 mol%. Experimental results and simulations correspond well to one another. Additional height of profile at methylene region between  $5 \text{ \AA} < z < 12 \text{ \AA}$  is likely due to increased tail packing density in experiments, a known limitation of the GROMOS 54A7 forcefield used for simulations.

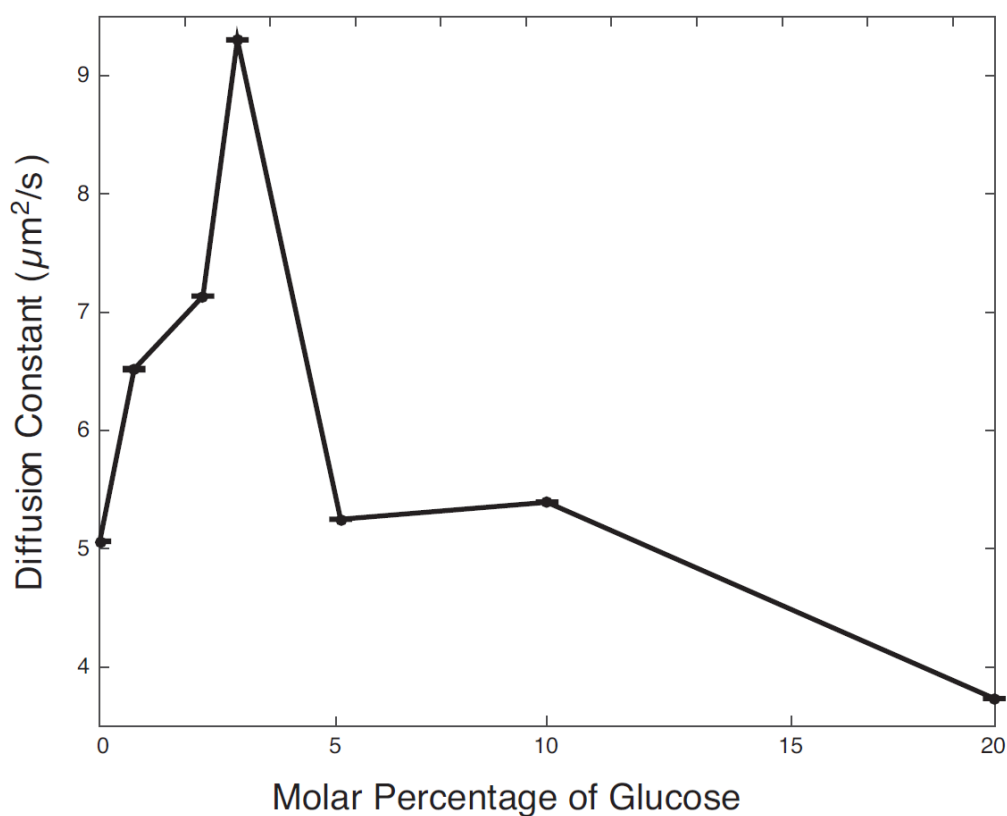

**Figure S2.** Lateral diffusion constant for phospholipids as a function of molar percentage of glucose from MD simulations. The phosphorous atoms in the lipid headgroups were used to track diffusion and linear regression as the associated mean squared displacements were used to derive a diffusion coefficient. Results correspond well to similarly structured systems [1]. Lipid diffusion peaks at intermediate glucose concentration before again decreasing, achieving values beneath that of a pure dehydrated DMPC bilayer at 20 mol%. The initial increase suggests that the presence of the solute disrupts lipid packing and leads to increased lateral movement at intermediate concentrations; however, at higher glucose levels, the impedance to movement resulting from the additional molecular presence slows down overall movement. This is supported by the hydrogen bonding data wherein the highest sugar concentrations display the lowest asymptotic number of hydrogen bonds per lipid, suggesting that the lipids are not optimally structured due to the increase solute presence. Diffusion constants for glucose molecules were found to be independent of concentration.

**Table S1.** Parameters of double stretched exponentials used to fit autocorrelation functions for MD systems. All data sets were fit to an equation of the form  $f = B + Ae^{(t/T_1)^{\beta_1}} + (A - a)e^{(t/T_2)^{\beta_2}}$ . The four methylene carbon windows described here are on the SN1 chain of the DMPC lipids analyzed. All fits achieved an  $r^2$  value greater than 0.99.

| Molar Percentage of Glucose (%) | Constant Offset (B) | Atomic Scaling Factor (A) | Atomic Time Constant (T <sub>1</sub> ) | Atomic Stretching Exponent (β <sub>1</sub> ) | Molecular Scaling Factor (A-a) | Molecular Time Constant (T <sub>2</sub> ) | Molecular Stretching Exponent (β <sub>2</sub> ) |
|---------------------------------|---------------------|---------------------------|----------------------------------------|----------------------------------------------|--------------------------------|-------------------------------------------|-------------------------------------------------|
| <b>Carbon Triplet 4-6</b>       |                     |                           |                                        |                                              |                                |                                           |                                                 |
| 0 (Hydrated)                    | 0.0216              | 0.9                       | 0.2                                    | 27.9044                                      | 0.6247                         | 499.3788                                  | 0.5624                                          |
| 0 (Dehydrated)                  | 0.0298              | 0.9                       | 0.2                                    | 29.3118                                      | 0.5893                         | 799.4058                                  | 0.5753                                          |
| 0.8 (Dehydrated)                | 0.0332              | 0.9                       | 0.2                                    | 28.6058                                      | 0.5960                         | 724.9174                                  | 0.6070                                          |
| 2.5 (Dehydrated)                | 0.0321              | 0.9                       | 0.2                                    | 29.7790                                      | 0.5905                         | 771.3065                                  | 0.5963                                          |
| 5 (Dehydrated)                  | 0.0402              | 0.9                       | 0.2                                    | 28.5006                                      | 0.5826                         | 816.0912                                  | 0.5295                                          |
| 10 (Dehydrated)                 | 0.0348              | 0.9                       | 0.2                                    | 29.6927                                      | 0.5877                         | 680.7519                                  | 0.5699                                          |
| 20 (Dehydrated)                 | 0.0447              | 0.9                       | 0.2                                    | 28.1668                                      | 0.5677                         | 752.8073                                  | 0.5782                                          |
| <b>Carbon Triplet 5-7</b>       |                     |                           |                                        |                                              |                                |                                           |                                                 |
| 0 (Hydrated)                    | 0.0084              | 0.9                       | 0.2                                    | 23.3853                                      | 0.6452                         | 345.5709                                  | 0.6211                                          |
| 0 (Dehydrated)                  | 0.0149              | 0.9                       | 0.2                                    | 24.5015                                      | 0.6183                         | 533.4344                                  | 0.6092                                          |
| 0.8 (Dehydrated)                | 0.0155              | 0.9                       | 0.2                                    | 24.2215                                      | 0.6251                         | 529.0910                                  | 0.6492                                          |
| 2.5 (Dehydrated)                | 0.0127              | 0.9                       | 0.2                                    | 25.3017                                      | 0.6198                         | 604.1372                                  | 0.6255                                          |
| 5 (Dehydrated)                  | 0.0189              | 0.9                       | 0.2                                    | 24.3347                                      | 0.6144                         | 659.6755                                  | 0.57                                            |
| 10 (Dehydrated)                 | 0.0163              | 0.9                       | 0.2                                    | 24.7026                                      | 0.6184                         | 527.2252                                  | 0.65                                            |
| 20 (Dehydrated)                 | 0.0255              | 0.9                       | 0.2                                    | 24.0634                                      | 0.5978                         | 681.3700                                  | 0.5830                                          |
| <b>Carbon Triplet 6-8</b>       |                     |                           |                                        |                                              |                                |                                           |                                                 |
| 0 (Hydrated)                    | 0.0094              | 0.9                       | 0.1873                                 | 20.6085                                      | 0.65                           | 244.4182                                  | 0.5726                                          |
| 0 (Dehydrated)                  | 0.0152              | 0.9                       | 0.2                                    | 21.4712                                      | 0.6297                         | 333.9923                                  | 0.5184                                          |
| 0.8 (Dehydrated)                | 0.0161              | 0.9                       | 0.2                                    | 21.2580                                      | 0.6266                         | 334.6376                                  | 0.5662                                          |
| 2.5 (Dehydrated)                | 0.0147              | 0.9                       | 0.2                                    | 21.5870                                      | 0.6323                         | 357.1928                                  | 0.5675                                          |
| 5 (Dehydrated)                  | 0.0174              | 0.9                       | 0.2                                    | 21.3150                                      | 0.6243                         | 395.2746                                  | 0.5090                                          |
| 10 (Dehydrated)                 | 0.0156              | 0.9                       | 0.2                                    | 21.5353                                      | 0.6301                         | 348.0691                                  | 0.5644                                          |
| 20 (Dehydrated)                 | 0.0249              | 0.9                       | 0.2                                    | 20.3496                                      | 0.6118                         | 398.8423                                  | 0.5547                                          |
| <b>Carbon Triplet 7-9</b>       |                     |                           |                                        |                                              |                                |                                           |                                                 |
| 0 (Hydrated)                    | 0.0046              | 0.9                       | 0.1777                                 | 17.1156                                      | 0.65                           | 169.0201                                  | 0.5793                                          |
| 0 (Dehydrated)                  | 0.0095              | 0.9                       | 0.2                                    | 17.5311                                      | 0.6455                         | 206.8435                                  | 0.5228                                          |
| 0.8 (Dehydrated)                | 0.009               | 0.9                       | 0.2                                    | 17.8049                                      | 0.6360                         | 196.78                                    | 0.5445                                          |
| 2.5 (Dehydrated)                | 0.0078              | 0.9                       | 0.2                                    | 18.0503                                      | 0.6430                         | 218.5694                                  | 0.5449                                          |
| 5 (Dehydrated)                  | 0.0096              | 0.9                       | 0.2                                    | 17.9077                                      | 0.6349                         | 248.4472                                  | 0.4790                                          |
| 10 (Dehydrated)                 | 0.0081              | 0.9                       | 0.2                                    | 18.1400                                      | 0.6390                         | 197.6478                                  | 0.5306                                          |
| 20 (Dehydrated)                 | 0.0156              | 0.9                       | 0.2                                    | 17.5424                                      | 0.6280                         | 261.8248                                  | 0.4876                                          |

## References

1. Rifichi, S.; D'Angelo, G.; Crupi, C.; Branca, C.; Conti Nibali, V.; Corsaro, C.; Wanderlingh, U. Influence of Alcohols on the Lateral Diffusion in Phospholipid Membranes. *J. Phys. Chem.* **2016**, *120*, 1285–1290.
